# Supplementary material
Source: publisher site journal article supplement (https://www.dovepress.com/article/339549)
Supplement: Supplementary file 1 [file get_supplementary_file.php]

**Table S1.** Panel of genes used in the RI-DR assay

| **Symbol** | **Gene name** | **Function** | **Position** |
| --- | --- | --- | --- |
| TRPV6 | *TRPV6* Transient receptor potential cation channel, subfamily V, member 6 | Calcium-permeable channels, such as TRPV6, participate in neurotransmission, muscle contraction, and exocytosis by providing calcium as an intracellular second messenger. | 7q33-q34 |
| DDX39 | DEAD (Asp-Glu-Ala-Asp) box polypeptide 39 | Involved in embryogenesis, spermatogenesis, and cellular growth and division | 19p13.12 |
| BUB1 | *BUB1* budding uninhibited by benzimidazoles 1 homolog beta (yeast) | A kinase involved in spindle checkpoint function; impaired spindle checkpoint function has been found in many forms of cancer | 15q15 |
| CCR1 | Chemokine (C-C motif) receptor 1 | A member of the beta chemokine receptor family, critical for the recruitment of effector immune cells to the site of inflammation | 3p21 |
| STIL | SCL/TAL1 interrupting locus | Increased mitotic activity in tumor cells | 1p32 |
| BLM | Bloom syndrome | Autosomal recessive disorder characterized by proportionate pre- and postnatal growth deficiency; sun-sensitive, telangiectatic, hypo- and hyperpigmented skin; predisposition to malignancy and chromosomal instability | 15q26.1 |
| C16orf7 | Chromosome 16 open reading frame 7 | Adenosine triphosphate synthase; subunit b-like | 16q24 |
| PIM1 | pim-1 oncogene | The proto-oncogene PIM1 encodes a protein kinase upregulated in prostate cancer | 6p21.2 |
| TPX2 | *TPX2*, microtubule associated | Nuclear proliferation-associated protein whose expression is restricted to cell cycle phases S, G2, and M | 20q11.2 |
| PTI1 | Homo sapiens elongation factor 1-alpha 1 | A class of oncogenes that could affect protein translation and contribute to carcinoma development in human prostate and other tissues |  |
| TCF3 | Transcription factor 3 (E2A immunoglobulin enhancer binding factors E12/E47 | Perhaps all t(1;19)(q23;p13) chromosomal translocations; the most frequent cytogenetic change in acute lymphoblastic leukemia; contain rearrangements of the *E2A* gene | 19p13.3 |
| CCNB1 | Cyclin B1 | A regulatory protein involved in mitosis | 5q12 |
| DTX2 | deltex 2, E3 ubiquitin ligase | Regulator of Notch signaling, a signaling pathway involved in cell-cell communications that regulates a broad spectrum of cell-fate determinations. Probably acts both as a positive and negative regulator of Notch, depending on the developmental and cell context. Mediates the antineural activity of Notch, possibly by inhibiting the transcriptional activation mediated by MATCH1. Functions as a ubiquitin ligase protein in vitro, suggesting that it may regulate the Notch pathway via some ubiquitin ligase activity. | 7q11.23 |
| ENSA | Endosulfine alpha | A highly conserved cAMP-regulated phosphoprotein (ARPP) family; candidate gene for type 2 diabetes | 1q21.2 |
| RCHY1 | Ring finger and CHY zinc finger domain containing 1 | Oncogenic because loss of p53 function contributes directly to malignant tumor development | 4q21.1 |
| NFATC2IP | Nuclear Factor Of Activated T-Cells, Cytoplasmic, Calcineurin-Dependent 2 Interacting Protein | In T-helper 2 (Th2) cells, regulates the magnitude of NFAT-driven transcription of a specific subset of cytokine genes, including IL3, IL4, IL5 and IL13, but not IL2. Recruits PRMT1 to the IL4 promoter; this leads to enhancement of histone H4 'Arg-3'-methylation and facilitates subsequent histone acetylation at the IL4 locus, thus promotes robust cytokine expression (By similarity). Down-regulates formation of poly-SUMO chains by UBE2I/UBC9 | 16p11.2 |
| OBSL1 | Obscurin-like 1 | Unknown | 2q35 |
| MMP15 | Matrix metallopeptidase 15 | Involved in the breakdown of extracellular matrix in normal physiological processes, such as embryonic development, reproduction, and tissue remodeling, as well as in disease processes, such as arthritis and metastasis | 16q13-q21 |
